# Supplementary material
Source: PubMed Central journal article supplement (PMC1567661)

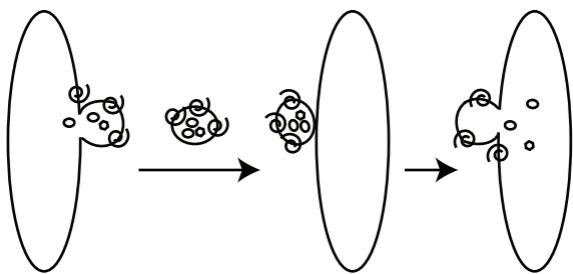

Budding

Transport

Tethering

Fusion

Supplement: pnas_0601617103_1.pdf [file pnas_0601617103_1.pdf]

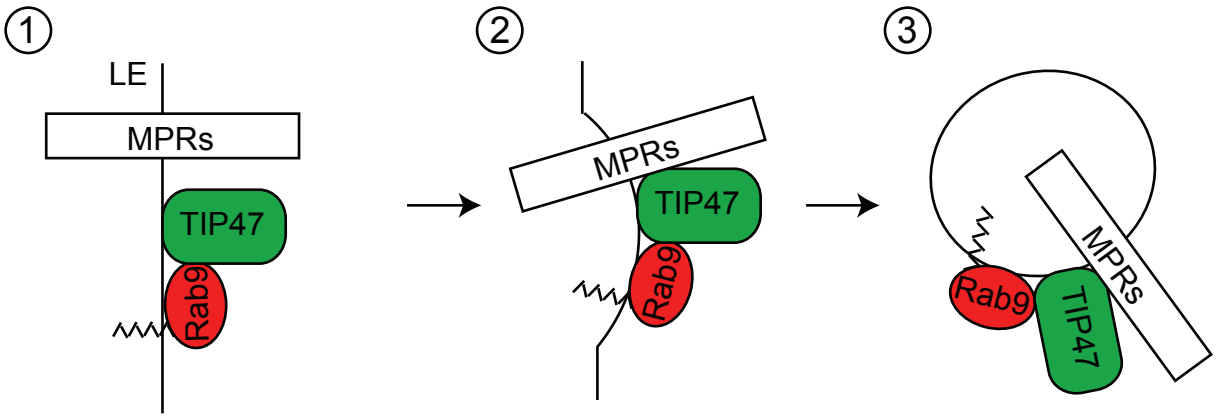

Supplement: pnas_0601617103_2.pdf [file pnas_0601617103_2.pdf]

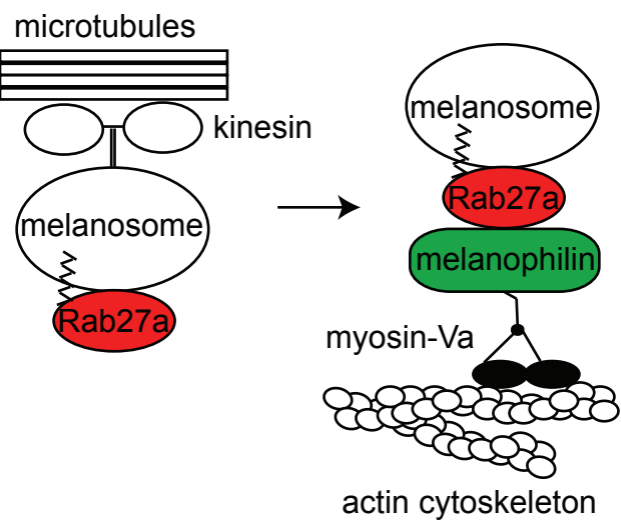

Supplement: pnas_0601617103_3.pdf [file pnas_0601617103_3.pdf]

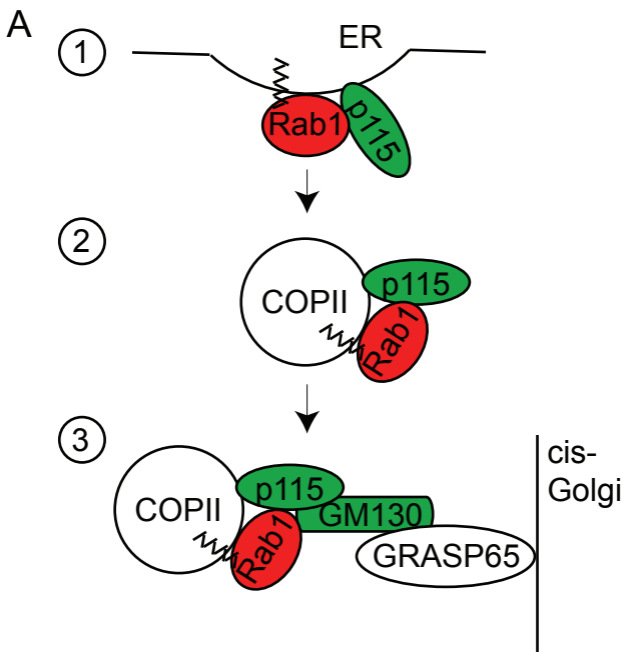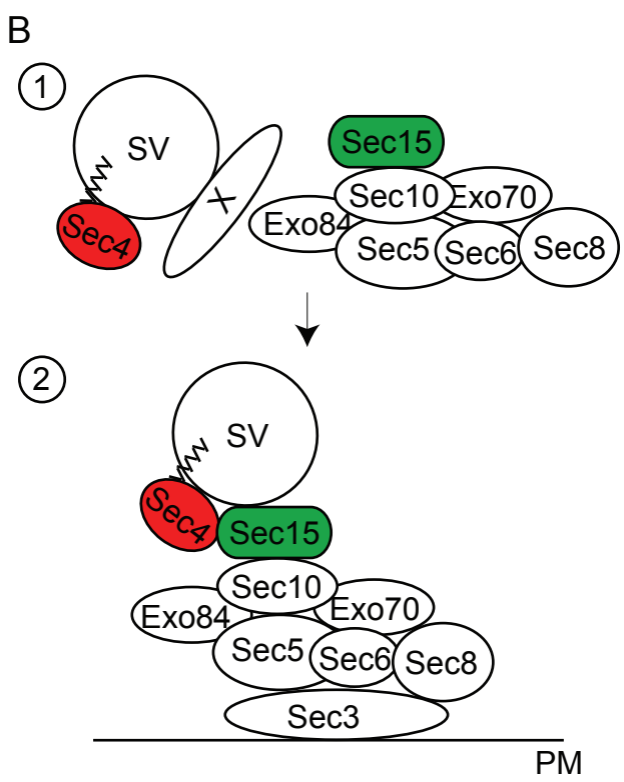

Supplement: pnas_0601617103_4.pdf [file pnas_0601617103_4.pdf]

A

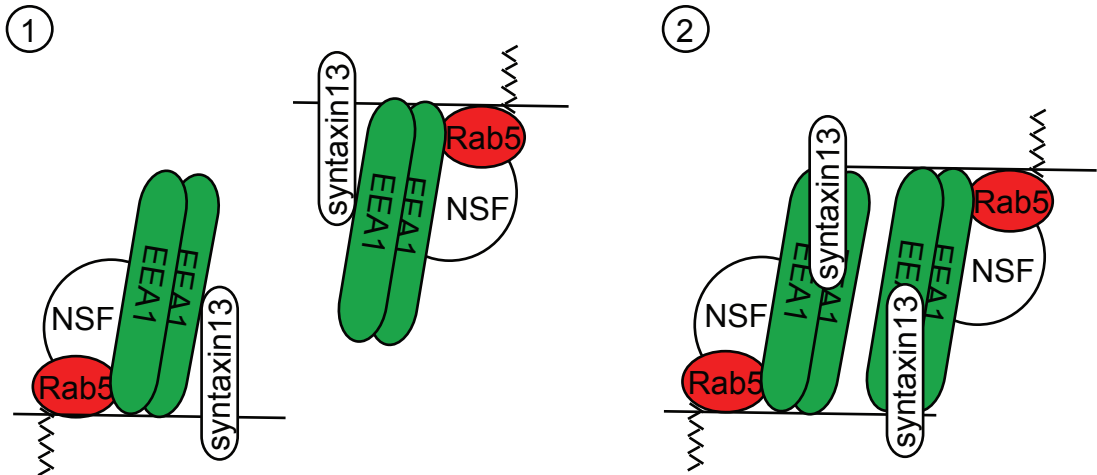

B

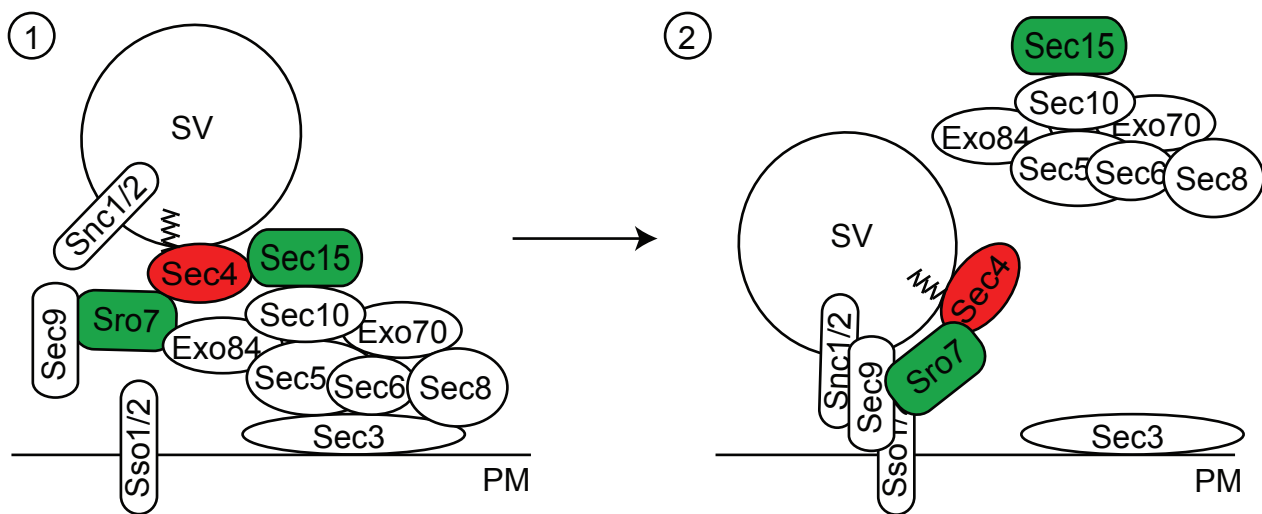

Supplement: pnas_0601617103_5.pdf [file pnas_0601617103_5.pdf]
